# Supplementary material
Source: PubMed Central journal article supplement (PMC3143639)
Supplement: supp_M110.197947_jbc.M110.197947-1.pdf [file supp_M110.197947_jbc.M110.197947-1.pdf]

Supplemental data – Mul *et al.*, 2011

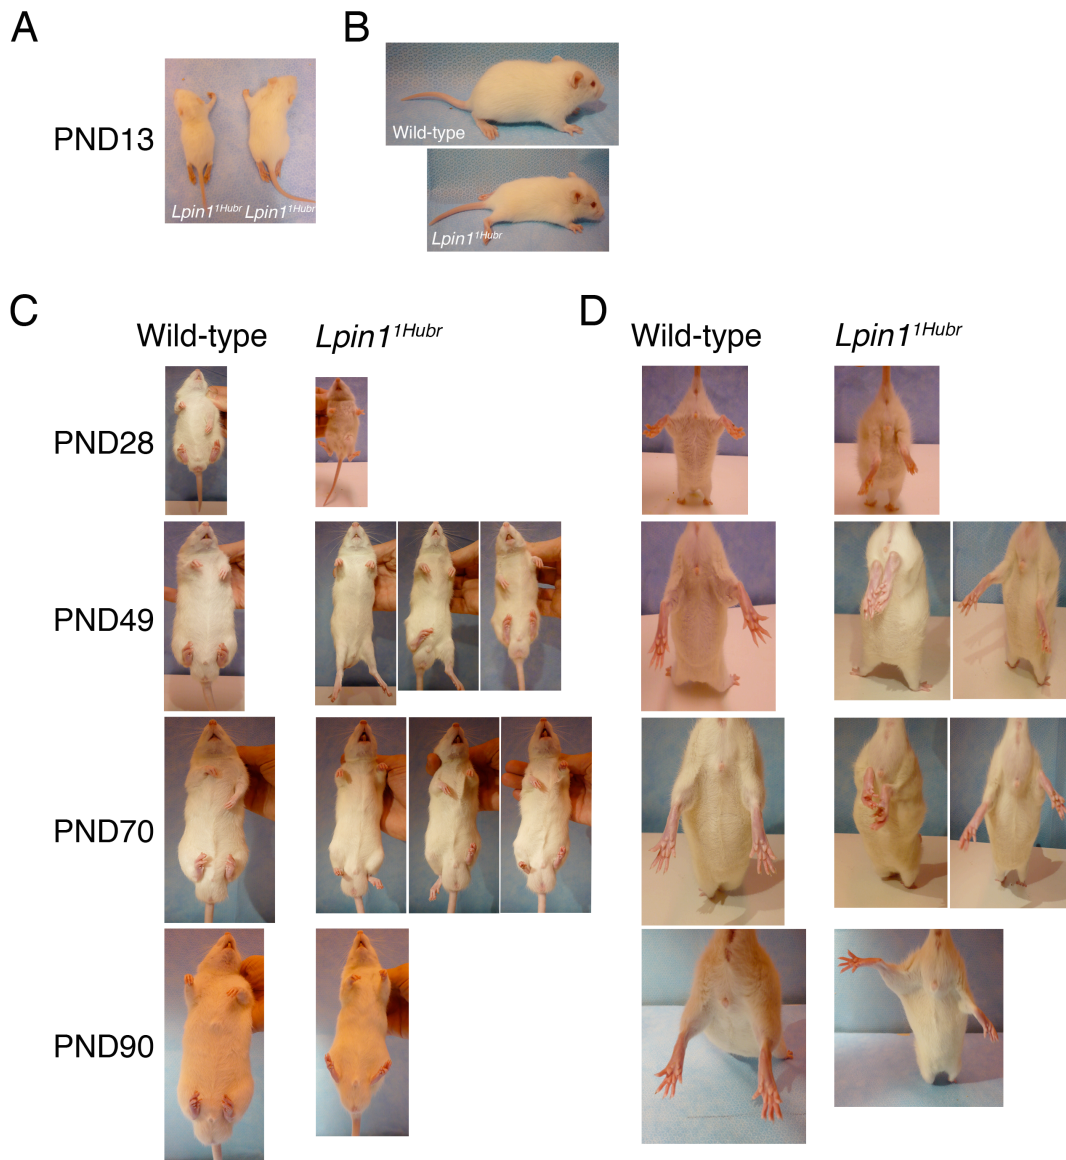

**Supplemental Figure S1. Progression of neuropathy, lipodystrophy and muscle wasting phenotypes in *Lpin1*<sup>Hubr</sup> rats**

**A.** The onset of the *Lpin1*<sup>Hubr</sup> phenotype occurred approximately between PND 7 and PND 14. Early onset (left male pup) resulted in a more severe phenotype compared to later onset (right male pup) due to decreased mobility, and possibly decreased suckling behavior. **B.** At PND 13, *Lpin1*<sup>Hubr</sup> pups showed severe lipodystrophy, hindquarter muscle wasting, and decreased body length as compared to wild-type pups. **C.** At PND 28, *Lpin1*<sup>Hubr</sup> rats showed severe lipodystrophy, hindquarter muscle wasting, a decreased body length, and no characteristic retraction of the hindlimbs as compared to wild-type rats. However, at PND 49 and onwards, some *Lpin1*<sup>Hubr</sup> rats gain the ability to retract their hindlimbs when picked up. Moreover, the severe lipodystrophy and hindquarter muscle wasting in *Lpin1*<sup>Hubr</sup> rats became less pronounced. At PND 90, almost all *Lpin1*<sup>Hubr</sup> rats regain the ability to retract their hindlimbs. **D.** Wild-type rats splayed their hindlimbs and toes when picked up by the tail, whereas *Lpin1*<sup>Hubr</sup> rats clenched their hindlimbs to their body. However, at PND 49 and onwards, *Lpin1*<sup>Hubr</sup> rats splayed their hindlimbs and toes, or clenched their hindlimbs to their body when picked up by the tail. At PND 90, almost all *Lpin1*<sup>Hubr</sup> rats regained the ability to splay their hindlimbs.

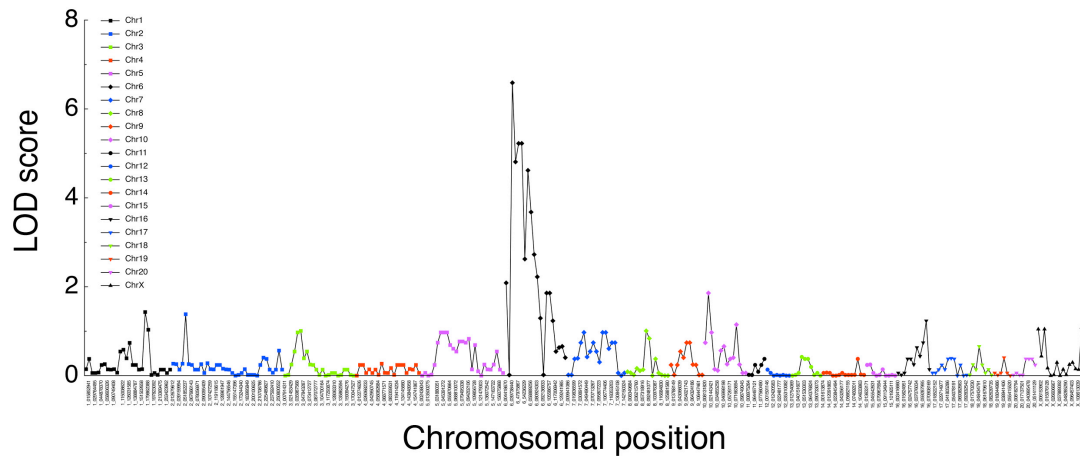

**Supplemental Figure S2. Linkage analysis**

Linkage analysis based on the genotyping results in the Wistar/BN F<sub>5</sub> population using 321 informative markers revealed a significant LOD score for the *Lpin1*<sup>Hubr</sup> mutation in a region on chromosome 6 between 37.1Mb and 40.7Mb. Rat *Lpin1* is located on chromosome 6 at 40.3Mb.

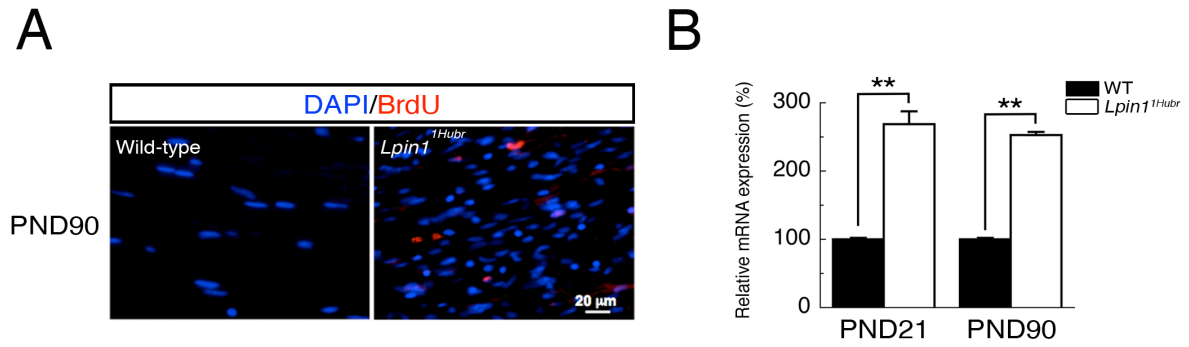

**Supplemental Figure S3. Increased DNA replication and cell proliferation in *Lpin1*<sup>Hubr</sup> sciatic nerves.**

**A.** Immunohistochemistry of DAPI and BrdU in medial sciatic nerve tissue at PND 90 revealed increased cellularity and DNA replication in *Lpin1*<sup>Hubr</sup> rats as compared to wild-type rats. **B.** Relative expression of *Cyclin D1* (marker of cell proliferation) was increased in *Lpin1*<sup>Hubr</sup> rats at PND 21 and PND 90 as compared to wild-type rats (\*\*  $P < 0.001$ ;  $n = 2$  per group).

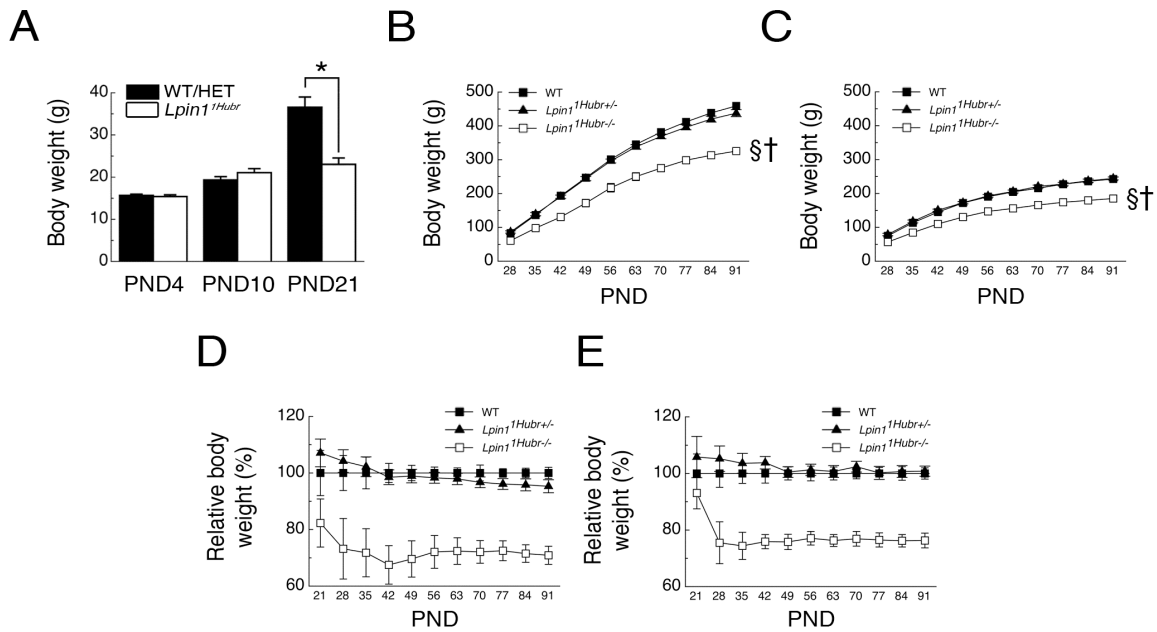

### Supplemental Figure S4. Decreased body weight in male and female *Lpin1*<sup>Hubr</sup> rats

**A.** No significant difference in body weight between wild-type/heterozygous (WT/HET; mixed gender) and *Lpin1*<sup>Hubr</sup> (mixed gender) rats was observed at PND 4 (n = 4-9 per group) and PND 10 (n = 7-18 per group). However, as the *Lpin1*<sup>Hubr</sup> phenotype develops, body weight started to diverge and body weight was decreased in *Lpin1*<sup>Hubr</sup> rats (mixed gender) as compared to wild-type rats (mixed gender) at PND 21 (n = 8-9 per group; \*  $P < 0.05$ ). **B.** Body weight of male *Lpin1*<sup>Hubr</sup> rats (*Lpin1*<sup>Hubr/-</sup>) was decreased as compared to male wild-type (WT) and heterozygous (*Lpin1*<sup>Hubr+/-</sup>) rats between PND 28 and PND 90 (n = 4-11 per group; § $P < 0.001$  *Lpin1*<sup>Hubr</sup> vs. WT; † $P < 0.001$  *Lpin1*<sup>Hubr/-</sup> vs. *Lpin1*<sup>Hubr+/-</sup>; Bonferroni *post hoc* analysis). **C.** Body weight of female *Lpin1*<sup>Hubr</sup> rats was decreased as compared to female wild-type and heterozygous rats between PND 28 and PND 90 (n = 11-13 per group; § $P < 0.001$  *Lpin1*<sup>Hubr</sup> vs. wild-type; † $P < 0.001$  *Lpin1*<sup>Hubr</sup> vs. heterozygous; Bonferroni *post hoc* analysis). **D.** Relative body weight of male *Lpin1*<sup>Hubr</sup> (*Lpin1*<sup>Hubr/-</sup>) rats was decreased as compared to male wild-type (WT) and heterozygous (*Lpin1*<sup>Hubr+/-</sup>) rats between PND 21 and 90 (n = 4-11 per group). **E.** Relative body weight of female *Lpin1*<sup>Hubr</sup> (*Lpin1*<sup>Hubr/-</sup>) rats was decreased as compared to female wild-type (WT) and heterozygous (*Lpin1*<sup>Hubr+/-</sup>) rats between PND 21 and 90 (n = 11-13 per group). Data are expressed as mean  $\pm$  S.E.M.

**Supplemental Table S1:** primer sequences (F, forward; R, reverse; m, mouse; r, rat)

| Name                             | Sequence                                                                                  |
|----------------------------------|-------------------------------------------------------------------------------------------|
| <i>mUbiquitin</i>                | F: CAGCCACCAAGACTGACCAA<br>R: CATTACCAGTGCTATGAGGGA                                       |
| <i>rUbiquitin</i>                | F: AGTGCGGAAAACCTGGAAGCC<br>R: GGACTGGATTACTTGGTCAGTCTTG                                  |
| <i>mCds1</i>                     | F: CTGAGCCTGGTGAAGAAGCACTAC<br>R: CCATGCGAACATATAGAAGTCA                                  |
| <i>rCds1</i>                     | F: TTTGAAGGCATGATATGGTTCCT<br>R: CATTGCAGATGACGCTTGATATG                                  |
| <i>rFabp4</i>                    | F: GGAGACGAGATGGTGACAAGC<br>R: TCACGCCTTTCATGACACATTC                                     |
| <i>rPpar<math>\gamma</math>1</i> | F: GCAAGAGATCACAGAGTATGCCAA<br>R: TCAAGGTTAATGAAACCAGGGATAT                               |
| <i>rPpar<math>\gamma</math>2</i> | F: TTTTGAAAACAAGGACTACCCTTTAC<br>R: GGCATCTCTGTGTCAACCATG                                 |
| <i>rLpinEx18-19</i>              | F1: GCCTGCCGATGTGTATTCCTAC<br>F2: CAAAGCTGTATCACAAAGTAAGCCA<br>R1: ATTCTATTCAGGGACACTCCCA |
| <i>rLpin1<math>\alpha</math></i> | F3: GCCCCAGTCCTTCAGGCTC<br>R3: GCTCAGAATCACTTTTTGGTGTTG                                   |
| <i>rLpin1<math>\beta</math></i>  | F4: GTAGATTGTCAGAGGACTCCCCCT<br>R4: CAAGAGCTAGAGAGAACTCCCTCG                              |
| <i>rMp<math>\zeta</math></i>     | F: TTCACAAGTCTTCTAAGGACTCCTCG<br>R: GCACTGGCGTCTGCCG                                      |
| <i>rPmp22</i>                    | F: GGAGTCTTCAAATCCTTGCTG<br>R: GATGGCCGCTGCACTCAT                                         |
| <i>rKrox20</i>                   | F: GGAGGCCCTTTGATCAGA<br>R: TGTTGATCATGCCATCTCCAG                                         |
| <i>rOct6</i>                     | F: GAGCTTCAAGAACATGTGCAAGCT<br>R: TCCAGCCACTTGTTGAGCAG                                    |
| <i>rCyclinD1</i>                 | F: GCACTTTCTTTCCAGAGTCATCAA<br>R: CAGGCACGGAGGCAGTC                                       |
